# Supplementary material for: Comparing the associations of central venous pressure and pulmonary artery pulsatility index with postoperative renal injury
Source: Frontiers journal article supplement (doi:10.3389/fcvm.2022.967596), 2022-10-12
Supplement: Data_Sheet_1.PDF [file Data_Sheet_1.PDF]

# Supplemental Figure 1: Cardiothoracic ICU Ventilation Weaning Protocol

## INITIATION AND MAINTENANCE

### PATHWAY

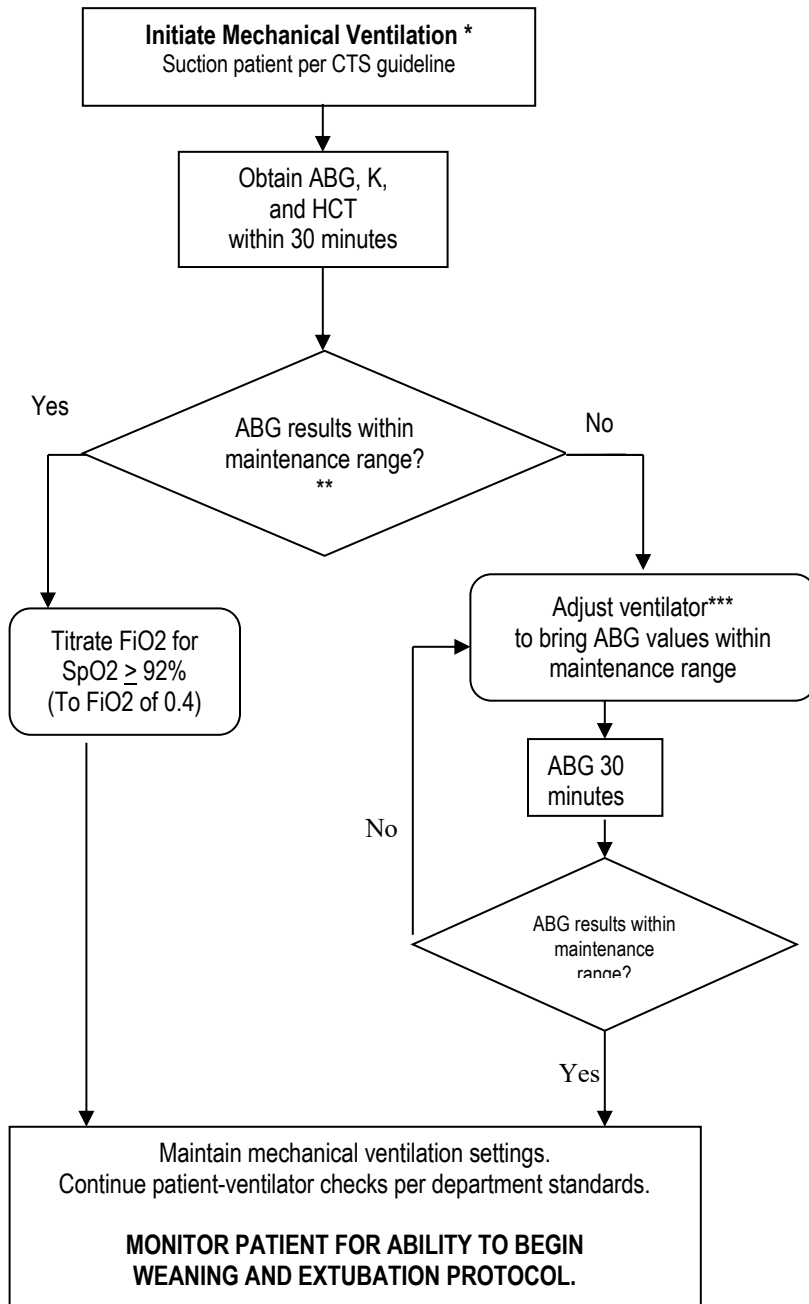

### CLINICAL INFORMATION

\* INITIAL SETTINGS: (Alarms per department standard)

Assist Control

R.R. 15 (range 14 – 18)

Vt 6 -10mL/kg I.B.W.

PEEP 5 cmH2O (range 5 - 10cmH2O)

(notify physician if you increase PEEP over 7)

FiO2 1.0 (range 0.4 to1.0 – keep SpO2 >92%)

Pause none

IBW (male) =  $50 + 2.3(\text{ht. inch} - 60)$

(female) =  $45.5 + 2.3(\text{ht. inch} - 60)$

(2.54cm = 1 inch)

\*\* MAINTENANCE ABG RANGE:

pH 7.36- 7.48

PaCO2 35 – 42mm Hg (Target 40)

PaO2 >70mmHg or

SpO2 ≥92%

### \*\*\*VENTILATOR REFERENCE:

Hypoventilation: pH low, PaCO2 high

Respiratory rate may be changed; range 14 - 18.

Tidal Volume may be changed:

a. Vt should remain inside 6-10 mL/kg IBW.

b. The increased tidal volume should not result in plateau pressure above 30 cmH2O

Hyperventilation: pH high, PaCO2 low

Assess for extubation protocol.

Respiratory rate may be decreased; range 8-14

Tidal volume may be decreased. (Vt= 6-10mL/kg IBW)

$$V_e = \frac{\text{present } V_e \times \text{present } PaCO_2}{\text{desired } PaCO_2}$$

Notify physician if the third set of ABG's fall outside the maintenance range. Notify physician about any and all concerns.

## WEANING AND EXTUBATION

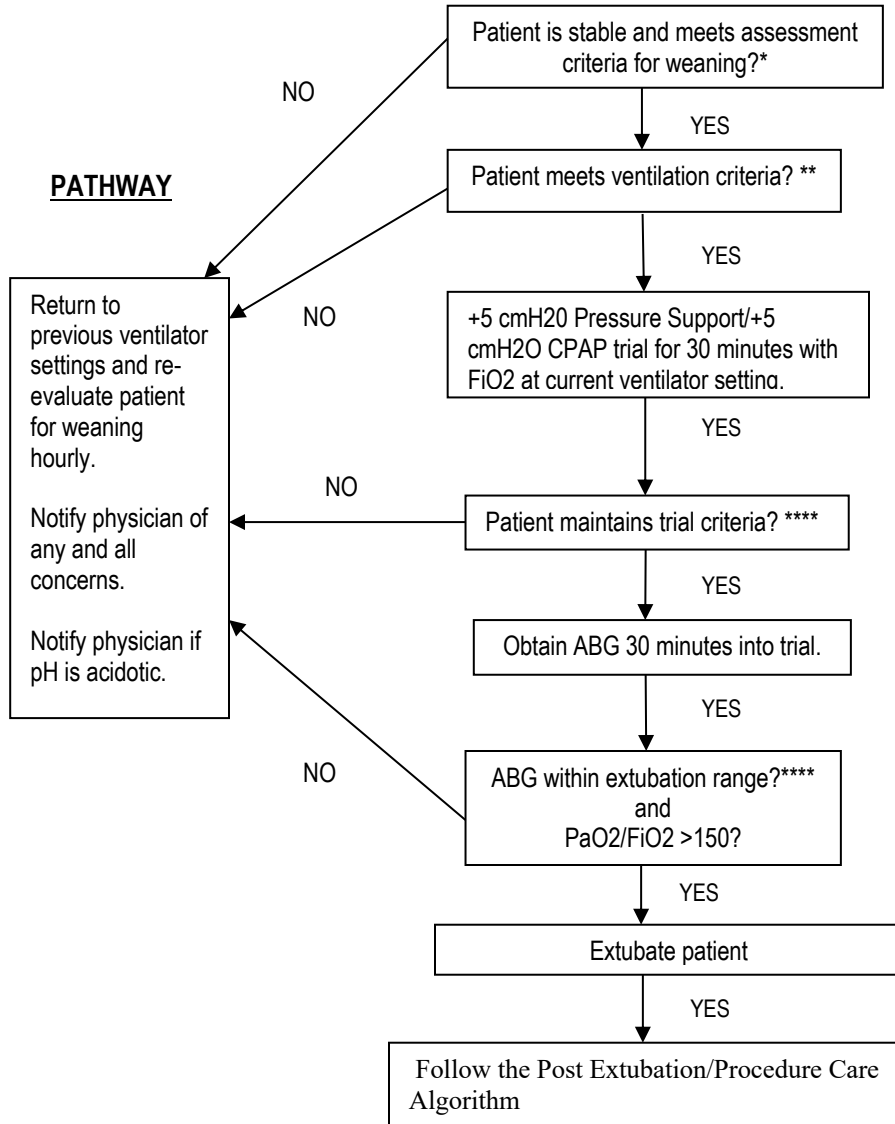

### CLINICAL INFORMATION

#### **\*ASSESSMENT CRITERIA**

Alert and follows commands  
Able to lift head off of bed  
Small or moderate amount of sputum  
Stable pulse rate  
Stable cardiac rhythm  
Stable blood pressure  
Balloon pump-contact MD for direction  
< 200cc/hr combined chest tube drainage over the last 2 hours  
Airway leak present when cuff down  
PEEP 5cm H2O  
PaO2/FiO2 ratio >150

#### **\*\*VENTILATION CRITERIA**

RR > 6 and < 25  
MIP > 20 cm H2O  
RSBI < 100 (RR/Vt=RSBI)

#### **\*\*\*\*TRIAL CRITERIA**

RSBI < 100  
RR < 35  
SpO2 > 92%  
HR < 140 beats/minute  
HR <20% increase or decrease from baseline  
No dysrhythmia present  
Systolic BP < 180 mmHg and > 90mmHg  
No anxiety or diaphoresis from increased WOB

#### **\*\*\*\*ABG EXTUBATION RANGE**

pH 7.33-7.48  
PaCO2 33-48mmHg  
PaO2 >70 mmHg
